# Supplementary material for: Characterization of two new degradation products of atorvastatin calcium formed upon treatment with strong acids
Source: publisher site journal article supplement (doi:10.3762/bjoc.15.206), 2019-09-02

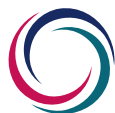

## Supporting Information

for

### Characterization of two new degradation products of atorvastatin calcium formed upon treatment with strong acids

Jürgen Krauß, Monika Klimt, Markus Lubert, Peter Mayer and Franz Bracher

*Beilstein J. Org. Chem.* **2019**, *15*, 2085–2091. [doi:10.3762/bjoc.15.206](https://doi.org/10.3762/bjoc.15.206)

### checkCIF/PLATON report (Structure factors for artefacts 6 (wq033) and 7 (wv633))

# checkCIF/PLATON report

Structure factors have been supplied for datablock(s) wq033, wv633

THIS REPORT IS FOR GUIDANCE ONLY. IF USED AS PART OF A REVIEW PROCEDURE FOR PUBLICATION, IT SHOULD NOT REPLACE THE EXPERTISE OF AN EXPERIENCED CRYSTALLOGRAPHIC REFEREE.

No syntax errors found.      CIF dictionary      Interpreting this report

## Datablock: wq033

---

Bond precision:    C-C = 0.0081 A                      Wavelength=0.71073

Cell:                      a=9.6001(8)              b=17.4122(16)              c=38.547(4)  
                                    alpha=90              beta=90                      gamma=90

Temperature:              296 K

|                | Calculated     | Reported       |
|----------------|----------------|----------------|
| Volume         | 6443.5(10)     | 6443.5(10)     |
| Space group    | P 21 21 21     | P 21 21 21     |
| Hall group     | P 2ac 2ab      | P 2ac 2ab      |
| Moiety formula | C26 H26 F N O2 | C26 H26 F N O2 |
| Sum formula    | C26 H26 F N O2 | C26 H26 F N O2 |
| Mr             | 403.48         | 403.48         |
| Dx,g cm-3      | 1.248          | 1.248          |
| Z              | 12             | 12             |
| Mu (mm-1)      | 0.084          | 0.084          |
| F000           | 2568.0         | 2568.0         |
| F000'          | 2569.21        |                |
| h,k,lmax       | 11,20,46       | 11,20,46       |
| Nref           | 11798[ 6566]   | 11793          |
| Tmin,Tmax      | 0.997,0.998    | 0.960,1.000    |
| Tmin'          | 0.992          |                |

Correction method= # Reported T Limits: Tmin=0.960 Tmax=1.000  
AbsCorr = MULTI-SCAN

Data completeness= 1.80/1.00                      Theta(max)= 25.350

R(reflections)= 0.0667( 7567)                      wR2(reflections)= 0.1283( 11793)

S = 1.038                                              Npar= 818

---

The following ALERTS were generated. Each ALERT has the format

**test-name\_ALERT\_alert-type\_alert-level.**

Click on the hyperlinks for more details of the test.

---

● **Alert level C**

RINTA01\_ALERT\_3\_C The value of Rint is greater than 0.12  
Rint given 0.138  
STRVA01\_ALERT\_4\_C Flack test results are ambiguous.  
From the CIF: `_refine_ls_abs_structure_Flack` 0.500  
From the CIF: `_refine_ls_abs_structure_Flack_su` 0.000  
PLAT241\_ALERT\_2\_C High 'MainMol' Ueq as Compared to Neighbors of C43 Check  
PLAT242\_ALERT\_2\_C Low 'MainMol' Ueq as Compared to Neighbors of C60 Check  
PLAT242\_ALERT\_2\_C Low 'MainMol' Ueq as Compared to Neighbors of C64 Check  
PLAT334\_ALERT\_2\_C Small Aver. Benzene C-C Dist C47 -C52 1.37 Ang.  
PLAT340\_ALERT\_3\_C Low Bond Precision on C-C Bonds ..... 0.00809 Ang.  
PLAT906\_ALERT\_3\_C Large K Value in the Analysis of Variance ..... 4.668 Check  
PLAT910\_ALERT\_3\_C Missing # of FCF Reflection(s) Below Theta(Min). 6 Note

---

● **Alert level G**

PLAT020\_ALERT\_3\_G The Value of Rint is Greater Than 0.12 ..... 0.138 Report  
PLAT033\_ALERT\_4\_G Flack x Value Deviates > 3.0 \* sigma from Zero . 0.500 Note  
PLAT791\_ALERT\_4\_G Model has Chirality at C3 (Chiral SPGR) R Verify  
PLAT791\_ALERT\_4\_G Model has Chirality at C5 (Chiral SPGR) R Verify  
PLAT791\_ALERT\_4\_G Model has Chirality at C29 (Chiral SPGR) R Verify  
PLAT791\_ALERT\_4\_G Model has Chirality at C31 (Chiral SPGR) R Verify  
PLAT791\_ALERT\_4\_G Model has Chirality at C55 (Chiral SPGR) R Verify  
PLAT791\_ALERT\_4\_G Model has Chirality at C57 (Chiral SPGR) R Verify  
PLAT883\_ALERT\_1\_G No Info/Value for `_atom_sites_solution_primary` . Please Do !  
PLAT913\_ALERT\_3\_G Missing # of Very Strong Reflections in FCF ... 1 Note  
PLAT916\_ALERT\_2\_G Hooft y and Flack x Parameter Values Differ by . 0.19 Check  
PLAT978\_ALERT\_2\_G Number C-C Bonds with Positive Residual Density. 1 Info

---

- 0 **ALERT level A** = Most likely a serious problem - resolve or explain  
0 **ALERT level B** = A potentially serious problem, consider carefully  
9 **ALERT level C** = Check. Ensure it is not caused by an omission or oversight  
12 **ALERT level G** = General information/check it is not something unexpected
- 1 ALERT type 1 CIF construction/syntax error, inconsistent or missing data  
6 ALERT type 2 Indicator that the structure model may be wrong or deficient  
6 ALERT type 3 Indicator that the structure quality may be low  
8 ALERT type 4 Improvement, methodology, query or suggestion  
0 ALERT type 5 Informative message, check
- 

## Datablock: wv633

---

Bond precision: C-C = 0.0022 A Wavelength=0.71073

Cell: a=9.7398(4) b=10.4787(5) c=20.4221(9)  
alpha=90 beta=90 gamma=90

Temperature: 112 K

|                | Calculated     | Reported       |
|----------------|----------------|----------------|
| Volume         | 2084.29(16)    | 2084.29(16)    |
| Space group    | P 21 21 21     | P 21 21 21     |
| Hall group     | P 2ac 2ab      | P 2ac 2ab      |
| Moiety formula | C26 H26 F N O2 | C26 H26 F N O2 |
| Sum formula    | C26 H26 F N O2 | C26 H26 F N O2 |
| Mr             | 403.48         | 403.48         |
| Dx,g cm-3      | 1.286          | 1.286          |
| Z              | 4              | 4              |
| Mu (mm-1)      | 0.087          | 0.087          |
| F000           | 856.0          | 856.0          |
| F000'          | 856.40         |                |
| h,k,lmax       | 16,17,34       | 16,17,34       |
| Nref           | 10101[ 5594]   | 10078          |
| Tmin,Tmax      | 0.993,0.995    | 0.960,0.990    |
| Tmin'          | 0.991          |                |

Correction method= # Reported T Limits: Tmin=0.960 Tmax=0.990  
AbsCorr = MULTI-SCAN

Data completeness= 1.80/1.00          Theta(max)= 36.313

R(reflections)= 0.0524( 8541)          wR2(reflections)= 0.1307( 10078)

S = 1.082                                  Npar= 273

The following ALERTS were generated. Each ALERT has the format  
**test-name\_ALERT\_alert-type\_alert-level.**  
Click on the hyperlinks for more details of the test.

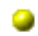

#### Alert level C

|                                                                    |           |
|--------------------------------------------------------------------|-----------|
| PLAT220_ALERT_2_C Non-Solvent Resd 1 C Ueq(max)/Ueq(min) Range     | 4.3 Ratio |
| PLAT222_ALERT_3_C Non-Solv. Resd 1 H Uiso(max)/Uiso(min) Range     | 4.6 Ratio |
| PLAT910_ALERT_3_C Missing # of FCF Reflection(s) Below Theta(Min). | 7 Note    |
| PLAT911_ALERT_3_C Missing FCF Refl Between Thmin & STh/L= 0.600    | 8 Report  |

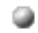

#### Alert level G

|                                                                    |              |
|--------------------------------------------------------------------|--------------|
| PLAT019_ALERT_1_G _diffn_measured_fraction_theta_full/*_max < 1.0  | 0.996 Report |
| PLAT791_ALERT_4_G Model has Chirality at C13 (Chiral SPGR)         | S Verify     |
| PLAT883_ALERT_1_G No Info/Value for _atom_sites_solution_primary . | Please Do !  |
| PLAT933_ALERT_2_G Number of OMIT Records in Embedded .res File ... | 12 Note      |
| PLAT978_ALERT_2_G Number C-C Bonds with Positive Residual Density. | 22 Info      |

0 **ALERT level A** = Most likely a serious problem - resolve or explain  
0 **ALERT level B** = A potentially serious problem, consider carefully  
4 **ALERT level C** = Check. Ensure it is not caused by an omission or oversight  
5 **ALERT level G** = General information/check it is not something unexpected

2 ALERT type 1 CIF construction/syntax error, inconsistent or missing data

3 ALERT type 2 Indicator that the structure model may be wrong or deficient  
3 ALERT type 3 Indicator that the structure quality may be low  
1 ALERT type 4 Improvement, methodology, query or suggestion  
0 ALERT type 5 Informative message, check

---

---

It is advisable to attempt to resolve as many as possible of the alerts in all categories. Often the minor alerts point to easily fixed oversights, errors and omissions in your CIF or refinement strategy, so attention to these fine details can be worthwhile. In order to resolve some of the more serious problems it may be necessary to carry out additional measurements or structure refinements. However, the purpose of your study may justify the reported deviations and the more serious of these should normally be commented upon in the discussion or experimental section of a paper or in the "special\_details" fields of the CIF. checkCIF was carefully designed to identify outliers and unusual parameters, but every test has its limitations and alerts that are not important in a particular case may appear. Conversely, the absence of alerts does not guarantee there are no aspects of the results needing attention. It is up to the individual to critically assess their own results and, if necessary, seek expert advice.

### **Publication of your CIF in IUCr journals**

A basic structural check has been run on your CIF. These basic checks will be run on all CIFs submitted for publication in IUCr journals (*Acta Crystallographica*, *Journal of Applied Crystallography*, *Journal of Synchrotron Radiation*); however, if you intend to submit to *Acta Crystallographica Section C* or *E* or *IUCrData*, you should make sure that full publication checks are run on the final version of your CIF prior to submission.

### **Publication of your CIF in other journals**

Please refer to the *Notes for Authors* of the relevant journal for any special instructions relating to CIF submission.

---

**PLATON version of 17/03/2019; check.def file version of 04/03/2019**



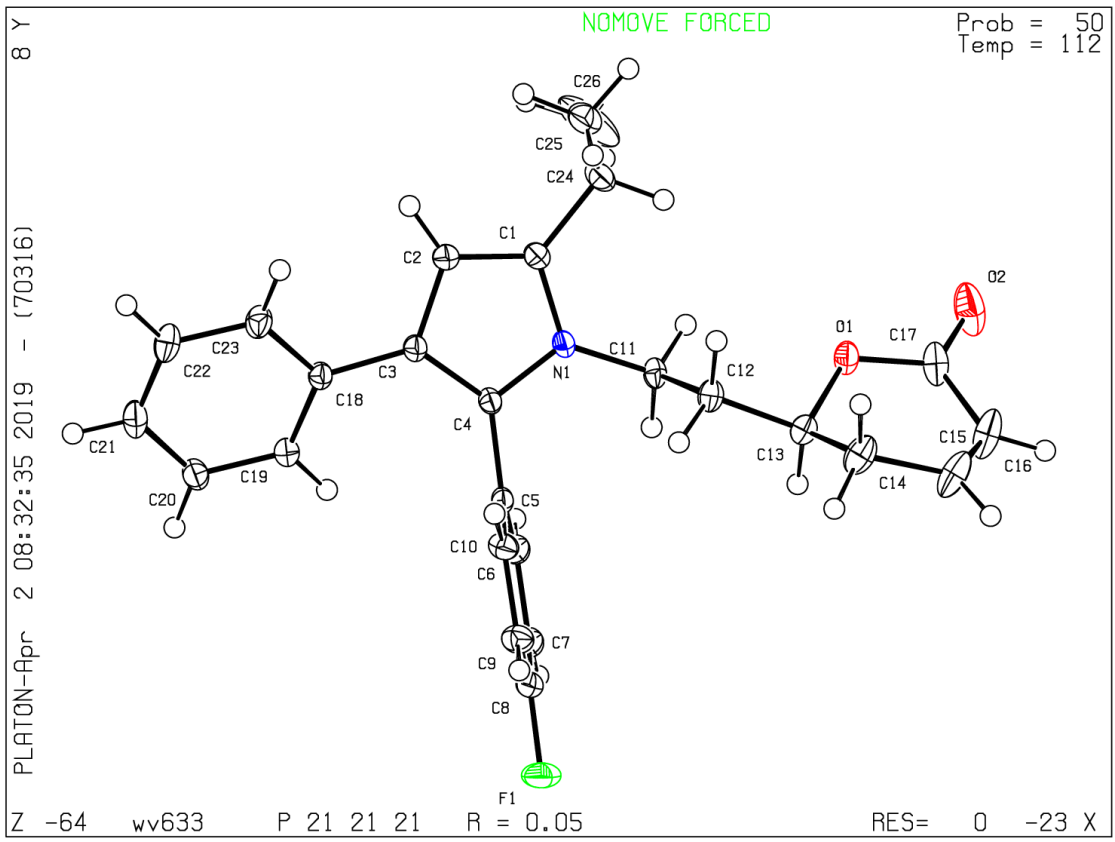

Supplement: Additional file 2 [file 1860-5397-15-206-S2.pdf]
