# Supplementary material for: Characterization of two new degradation products of atorvastatin calcium formed upon treatment with strong acids
Source: publisher site journal article supplement (doi:10.3762/bjoc.15.206), 2019-09-02
Supplement: Additional file 1 [file 1860-5397-15-206-S1.pdf]

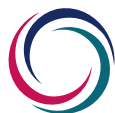

## Supporting Information

for

### **Characterization of two new degradation products of atorvastatin calcium formed upon treatment with strong acids**

Jürgen Krauß, Monika Klimt, Markus Lubber, Peter Mayer and Franz Bracher

*Beilstein J. Org. Chem.* **2019**, *15*, 2085–2091. [doi:10.3762/bjoc.15.206](https://doi.org/10.3762/bjoc.15.206)

**Materials and methods; stress tests and analytical data of the products obtained thereby; details of characterization of 6 and 7 by X-ray data; crystallographic data for 6 and 7, NMR spectra of artefacts 2, 3, 6, and 7**

## **Table of contents:**

1. Materials and methods
2. Stress tests and analytical data of the products obtained thereby
3. Details of characterization of **6** and **7** by X-ray data
4. Crystallographic data for **6** and **7**
5. NMR spectra of artefacts **2**, **3**, **6**, and **7**
6. References

## 1. Materials and methods

Atorvastatin calcium trihydrate (Ph. Eur.) was a gift of Prof. Dr. W. Frieß, LMU Munich. All solvents used were of HPLC grade or p.a. grade and/or purified according to standard procedures. Chemical reagents were purchased from Sigma-Aldrich (Schnelldorf, Germany) and Acros (Geel, Belgium). IR-spectra: Jasco FT/IR 4600 series (KBr pellet method); MS: Hewlett Packard MS-Engine, electron ionisation (EI) 70 eV, chemical ionisation (CI) with CH<sub>4</sub> (300 eV); MS spectra: Thermo Q Exactive GC Orbitrap or Finnigan MAT 95 spectrometer, HRESIMS spectra: Thermo Finnigan LTQ FT. NMR: Avance III HD 400 MHz Bruker BioSpin (<sup>1</sup>H: 400 MHz, <sup>13</sup>C: 100 MHz); 500 MHz Avance III HD 500 MHz Bruker BioSpin (<sup>1</sup>H: 500 MHz, <sup>13</sup>C: 125 MHz); melting points: Büchi Melting Point B-540 (not corrected); flash column chromatography (FCC): silica gel 60 (230–400 mesh, E. Merck, Darmstadt); HPLC: Shimadzu LC 10 pump, Shimadzu column oven CTO-10AS, Shimadzu autosampler SIL 10A, UV-detector Shimadzu LC 10 AS, column: Eurospher 100 – C18, 4 mm ID, (Knauer). Polarimeter: Perkin Elmer 241.

## 2. Stress tests and analytical data of the products obtained thereby

### 5-(4-Fluorophenyl)-1-(2-((2*R*,4*R*)-4-hydroxy-6-oxotetrahydro-2*H*-pyran-2-yl)ethyl)-2-isopropyl-*N*,4-diphenyl-1*H*-pyrrole-3-carboxamide (**2**)

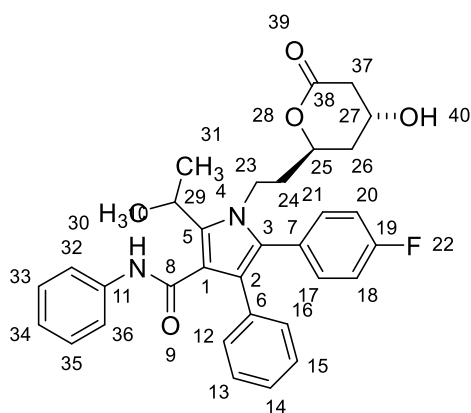

1.025 g (0.848 mmol) of atorvastatin calcium trihydrate (**1**) was dissolved in 50 mL 2 M aqueous hydrochloric acid and stirred for 2 h. Then the mixture was extracted with ethyl acetate (3 × 50 mL). The combined organic layers were dried over Na<sub>2</sub>SO<sub>4</sub> and the solvent was evaporated. The residue was purified by flash column chromatography (ethyl acetate) to give 503 mg (55%) of **2** as a white solid. The same product could be isolated when **1** was treated with 2 M aqueous hydrochloric acid under reflux for 4 h to give 595 mg (65%) of **2**. M.p. 165 °C (ref. [1] 160 – 162

°C).  $[\alpha]_D^{20} = +19.6$  (c 0.745, DMF);  $^1\text{H NMR}$  (400 MHz,  $\text{CDCl}_3$ )  $\delta$  7.16 – 7.04 (m, 9 H, 9 arom. CH), 7.02 – 6.89 (m, 5 H, 5 arom. CH), 6.80 (s, 1 H, NH), 4.56-4.48 (m, 1 H, CH, 25-H), 4.34-4.27 (m, 1 H, CH, 27-H), 4.22 (ddd,  $J = 14.9, 10.3, 5.0$  Hz, 1 H,  $\text{CH}_2$ , 23-H), 4.03 (ddd,  $J = 14.9, 9.9, 5.7$  Hz, 1 H,  $\text{CH}_2$ , 23-H), 3.62 – 3.45 (m, 1 H, CH, 29-H), 2.66 (dd,  $J = 17.7, 4.8$  Hz, 1 H,  $\text{CH}_2$ , 37-H), 2.56 (ddd,  $J = 17.8, 3.5, 1.6$  Hz, 1 H,  $\text{CH}_2$ , 37-H), 1.86-1.74 (m, 1 H,  $\text{CH}_2$ , 24-H), 1.74 – 1.60 (m, 2 H, 2  $\text{CH}_2$ , H-24, H-26), 1.56 – 1.49 (m, 1 H,  $\text{CH}_2$ , H-26), 1.58 – 1.49 (m, 6 H, 2  $\text{CH}_3$ , 31-H, 30-H).  $^{13}\text{C NMR}$  (100 MHz,  $\text{CDCl}_3$ )  $\delta$  169.3 (CO, C-38), 164.9 (CO, C-8), 162.4 (d,  $J = 249.6$  Hz, quat. C, C-19), 141.4 (quat. C), 138.2 (quat. C), 134.4 (quat. C), 133.1 (d,  $J = 9.0$  Hz, 2 arom. CH), 130.4 (2 arom. CH), 128.7 (quat. C), 128.7 (2 arom. CH), 128.4 (2 arom. CH), 128.0 (d,  $J = 3.2$  Hz, quat. C), 126.7 (arom. CH), 123.7 (arom. CH), 122.1 (quat. C), 119.7 (2 arom. CH), 115.7 (quat. C), 115.6 (d,  $J = 20.76$  Hz, 2 arom. CH), 73.0 (CH, C-25), 62.5 (CH, C-27), 40.8 ( $\text{CH}_2$ , C-23), 38.5 ( $\text{CH}_2$ , C-37), 37.2 ( $\text{CH}_2$ , C-24), 35.7 ( $\text{CH}_2$ , C-26), 26.2 (CH, C-29), 22.0 ( $\text{CH}_3$ ), 21.7 ( $\text{CH}_3$ ). IR (KBr):  $\nu$  ( $\text{cm}^{-1}$ ) = 3405, 2963, 2930, 1724, 1653, 1507, 1437, 1314, 1225, 1156, 1110, 1074, 1031, 1011, 915, 885, 808, 754, 694, 617. HR-ESI-MS calcd. for  $\text{C}_{33}\text{H}_{34}\text{FN}_2\text{O}_4^+$   $[\text{M}+\text{H}]^+$ : 541.2497, found: 541.2498.

**(S)-5-(4-Fluorophenyl)-2-isopropyl-1-(2-(6-oxo-3,6-dihydro-2H-pyran-2-yl)ethyl)-N,4-diphenyl-1H-pyrrole-3-carboxamide (3)**

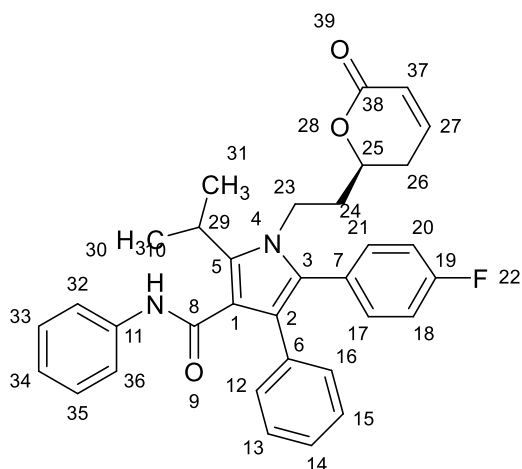

1.00 g (0.841 mmol) of atorvastatin calcium trihydrate (**1**) was dissolved in 200 mL toluene, 200 mg (1.07 mmol) *p*-toluenesulfonic acid were added and the suspension was refluxed for 5 h at a water separator. The solvent was evaporated, the residue dissolved in 50 mL aqueous 2 M hydrochloric acid and extracted with ethyl acetate (3 × 50 mL). The combined organic layers were dried over  $\text{Na}_2\text{SO}_4$ , the solvent was evaporated and the residue was purified by flash column chromatography (isohexane/ethyl acetate 1:1) to give 795 mg (95%) of **3** as an amorphous solid with an extremely broad melting interval (168–195 °C).  $[\alpha]_D^{20} = -49.6$  (c 0.74, DMF). The same

product could be isolated in >98% yield after refluxing atorvastatin calcium trihydrate (**1**) for two hours with 20% aqueous sulfuric acid. <sup>1</sup>H NMR (500 MHz, CDCl<sub>3</sub>) δ 7.21 – 7.11 (m, 9 H, 9 arom. CH), 7.06 (d, *J* = 7.7 Hz, 2 H, 2 arom. CH), 7.04 – 6.94 (m, 3 H, 3 arom. CH), 6.87 (s, 1 H, NH), 6.78 (ddd, *J* = 8.9, 5.7, 2.6 Hz, 1 H, -CH=, 27-H), 6.00 – 5.94 (m, 1 H, CH=, 37-H), 4.29-4.18 (m, 2 H, CH, CH<sub>2</sub>, 23-H, 25-H), 4.10-4.00 (m, 1 H, CH<sub>2</sub>, 23-H), 3.63-3.51 (m, 1 H, CH, 29-H), 2.22 - 2.06 (m, 2 H, CH<sub>2</sub>, 26-H), 2.04 - 1.92 (m, 1 H, CH<sub>2</sub>, H-24), 1.84 – 1.73 (m, 1 H, CH<sub>2</sub>, H-24), 1.57-1.51 (m 6 H, 2 CH<sub>3</sub>, 30-H, 31-H). <sup>13</sup>C NMR (125 MHz, CDCl<sub>3</sub>) δ 164.7 (CO), 163.5 (CO), 162.3 (d, *J* = 247.8 Hz, quat. C), 144.7 (CH=, C-27), 141.3 (quat. C), 138.3 (quat. C), 136.35 (quat. C), 133.1 (d, *J* = 8.1 Hz, 2 arom. CH), 130.4 (2 arom. CH), 128.7 (2 arom. CH), 128.4 (2 arom. CH), 128.1 (d, *J* = 4.2 Hz, quat. C), 127.5 (quat. C), 126.7 (arom. CH), 123.6 (arom. CH), 122.1 (quat. C), 121.3 (CH=, C-37), 119.6 (2 arom. CH), 115.7 (d, *J* = 21.4 Hz, 2 arom. CH), 75.2 (CH, C-25), 40.6 (CH<sub>2</sub>, C-23), 36.4 (CH<sub>2</sub>, C-24), 29.1 (CH<sub>2</sub>, C-26), 26.2 (CH, C-29), 22.0 (CH<sub>3</sub>), 21.7 (CH<sub>3</sub>). IR (KBr): ν (cm<sup>-1</sup>) = 3402, 2959, 2928, 1722, 1665, 1595, 1526, 1242, 1155, 1043, 816, 753, 693. MS (EI): *m/z* = 522 (M<sup>+</sup>, 10), 430 (100). HR-MS calcd. for C<sub>33</sub>H<sub>31</sub>O<sub>3</sub>N<sub>2</sub>F<sup>+</sup> [M<sup>+</sup>]: 522.2313, found: 522.2313.

**(1*S*,5*R*)-9-(4-Fluorophenyl)-11-isopropyl-10-phenyl-1,2,6,7-tetrahydro-3*H*,5*H*-1,5-methanopyrrolo[1,2-*e*][1,5]oxazonin-3-one (**6**)**

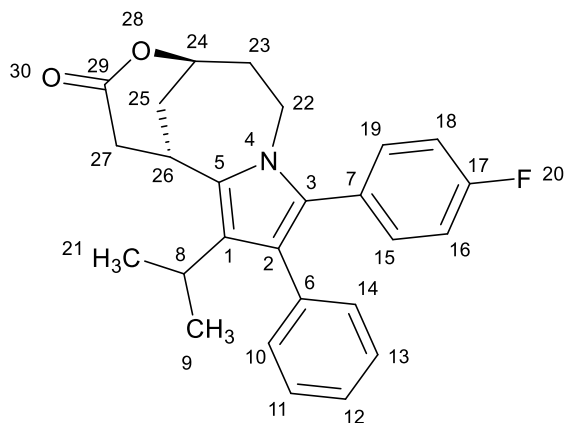

2.41 g (2.00 mmol) of atorvastatin calcium trihydrate (**1**) was dissolved in 50 mL concentrated (37%) aqueous hydrochloric acid and refluxed for 5 h. After addition of 40 mL water the mixture was extracted with ethyl acetate (3 × 40 mL). The combined organic layers were dried over Na<sub>2</sub>SO<sub>4</sub> and the solvent was evaporated. The residue was purified by flash column chromatography (isohexane-ethyl acetate 1:1) to give 775 mg (96%) of **6** as a white solid. M.p.: 208 °C. [ $\alpha$ ]<sub>D</sub><sup>20</sup> = -68.7 (c 2.07, DMF); <sup>1</sup>H NMR (500 MHz, CDCl<sub>3</sub>) δ 7.16 – 7.03 (m, 3 H, 3 arom. CH), 7.02 – 6.91 (m, 4 H, 4 arom. CH), 6.90 – 6.79 (m, 2 H, 2 arom. CH), 5.09 – 5.03 (m, CH, 24-

H), 3.95 (ddd,  $J = 15.6, 4.8, 2.8$  Hz, 1 H, CH<sub>2</sub> 22-H), 3.87 (dd,  $J = 9.3, 5.8$  Hz, 1 H, CH, 26-H), 3.63 (dd,  $J = 15.6, 12.2$  Hz, 1 H, CH<sub>2</sub>, 22-H), 3.06 (dd,  $J = 19.5, 10.2$  Hz, 1 H, CH<sub>2</sub>), 2.92 – 2.78 (m, 1 H, CH, 8-H), 2.51 – 2.41 (m, 1 H, CH<sub>2</sub>, 27-H), 2.35 – 2.20 (m, 1 H, CH<sub>2</sub>, 23-H), 2.06 – 1.96 (m, 1 H, CH<sub>2</sub>, 27-H), 1.94 - 1.86 (m, 1 H, CH<sub>2</sub>), 1.10 (m, , 6 H, 2 CH<sub>3</sub>, 21-H, 9-H). <sup>13</sup>C NMR (100 MHz, CDCl<sub>3</sub>)  $\delta$  170.3 (CO, C-29), 161.8 (d,  $J = 247$  Hz, quat. C, C-17), 136.5 (quat. C), 132.7 (d,  $J = 7.9$  Hz, 2 arom. CH), 131.7 (quat. C), 131.1 (2 arom. CH), 129.9 (quat. C), 128.3 (d,  $J = 3.4$  Hz, quat. C), 127.6 (2 arom. CH), 125.7 (arom. CH), 125.4 (quat. C), 122.3 (quat. C) 115.1 (d,  $J = 21.24$  Hz, 2 arom. CH), 77.3 (CH, C-24), 39.6 (CH<sub>2</sub>, C-22), 34.7 (CH<sub>2</sub>), 34.3 (CH<sub>2</sub>), 30.6 (CH<sub>2</sub>, C-27), 26.5 (CH), 25.2 (CH), 24.2 (CH<sub>3</sub>), 24.0 (CH<sub>3</sub>). IR (KBr):  $\nu$  (cm<sup>-1</sup>) = 2961, 2939, 1742, 1719, 1602, 1526, 1508, 1469, 1347, 1241, 1222, 1087, 1057, 846, 704. HR-ESI-MS calcd. for C<sub>26</sub>H<sub>27</sub>FNO<sub>2</sub><sup>+</sup> [M+H]<sup>+</sup>: 404.2020, found: 404.2020.

**(S)-6-(2-(2-(4-Fluorophenyl)-5-isopropyl-3-phenyl-1H-pyrrol-1-yl)ethyl)-5,6-dihydro-2H-pyran-2-one (7)**

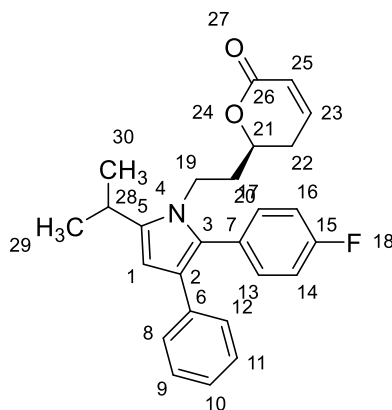

992 mg (0.821 mmol) of atorvastatin-calcium trihydrate (**1**) was dissolved in 20 mL concentrated sulfuric acid and the mixture was stirred for 2 h at 60 °C. The mixture was carefully diluted with 40 mL ice-water and extracted with ethyl acetate (3 × 40 mL). The combined organic layers were dried over Na<sub>2</sub>SO<sub>4</sub>, the solvent was evaporated and the residue purified by flash column chromatography (isohexane-ethyl acetate 1:1) to give 117 mg (18%) of **7** as a grey solid.  $[\alpha]_D^{20} = -46.7$  (c 0.51, DMF); <sup>1</sup>H NMR (400 MHz, CDCl<sub>3</sub>)  $\delta$  7.30 – 7.24 (m, 2 H, 2 arom. CH), 7.19 – 6.99 (m, 7 H, 7 arom. CH), 6.77 (ddd,  $J = 9.7, 5.9, 2.6$  Hz, 1 H, CH=, 23-H), 6.20 (s, 1 H, arom. CH, 1-H), 5.96 (ddd,  $J = 9.7, 2.6, 1.0$  Hz, 1 H, CH=, 25-H), 4.21 – 4.06 (m, 2 H, CH, CH<sub>2</sub>, 21-H, 19-H), 3.98 (ddd,  $J = 14.9, 9.1, 6.5$  Hz, 1 H, CH<sub>2</sub>, 19-H), 3.02 (m, 1 H, CH, 28-H), 2.17 – 1.93 (m, 2 H, CH<sub>2</sub>), 1.86 (dtd,  $J = 13.9, 8.9, 5.0$  Hz, 1 H, CH<sub>2</sub>), 1.74 – 1.57 (m, 1 H, CH<sub>2</sub>), 1.39 – 1.29 (m, 6 H, 2 CH<sub>3</sub>, 29-H, 30-H). <sup>13</sup>C NMR (100 MHz, CDCl<sub>3</sub>)  $\delta$  163.7 (CO, C-26), 162.3 (d,  $J = 248.4$  Hz, Hz, quat. C, C-15), 144.7 (-CH=, C-23), 140.6 (quat. C), 136.3 (quat. C), 132.9 (d,  $J = 8.2$  Hz, 2 arom.

CH), 129.6 (d,  $J = 3.3$  Hz, quat. C), 128.0 (2 arom. CH), 127.7 (quat. C), 127.5 (2 arom. CH), 125.0 (arom. CH), 122.6 (quat. C), 121.3 (-CH=, C-25), 115.9 (d,  $J = 16.0$  Hz, 2 arom. CH), 103.9 (arom. CH, C-1), 75.1 (CH, C-21), 39.5 (CH<sub>2</sub>, C-19), 36.2 (CH<sub>2</sub>, C-20), 29.1 (CH<sub>2</sub>, C-22), 25.7 (CH, C-28), 23.8 (CH<sub>3</sub>), 23.5 (CH<sub>3</sub>). MS (EI)  $m/z = 403$  (M<sup>+</sup>, 100), 388 (59), 360 (19), 276 (56). IR (KBr):  $\nu$  (cm<sup>-1</sup>) = 2962, 2925, 1720, 1599, 1523, 1507, 1348, 1240, 1222, 1087, 851, 695. HR-MS calcd. for C<sub>26</sub>H<sub>26</sub>FNO<sub>2</sub> [M<sup>+</sup>]: 403.1948, found: 403.1951.

### 3. Details of characterization of **6** and **7** by X-ray data

The data of **6** have been collected at room temperature on a Bruker D8 Quest I $\mu$ S diffractometer while those of **7** have been collected at 112 K on a Bruker D8 Venture TXS diffractometer. Mo K $\alpha$  radiation monochromated by multilayer mirror optics was applied in both experiments. The frames were integrated with the Bruker SAINT software package [2] using a narrow-frame algorithm. Data were corrected for absorption effects using the Multi-Scan method of SADABS [3]. The structures were solved and refined using the Bruker SHELXTL Software Package [4]. The hydrogen atoms were calculated in ideal geometry riding on their parent atoms. The data quality of **6** did not allow the determination of the correct absolute structure (the randomly chosen structure solution used to draw Figure 2 in the manuscript shows (*R*)-configuration at C3 and (*S*) configuration at C5 (numbering used in the graphic in Figure 2), as well as the stereocenters of the two independent molecules not displayed herein: C29, C31, C55 and C57). Hence, this structure has been refined as perfect inversion twin. However, the data of **7** led to a Flack parameter of 0.1(2) indicating the correct absolute structure as that with an (*S*)-configured stereocenter (data have been collected up to a resolution of 0.60 Å). The figures were drawn at the 50% ellipsoid probability level (ORTEP [5]).

Crystallographic data have been deposited with the Cambridge Crystallographic Data Centre (CCDC 1907390 (**6**), 1907391 (**7**)). These supplementary crystallographic data can be obtained free of charge from The Cambridge Crystallographic Data Centre via <https://www.ccdc.cam.ac.uk/structures/>.

#### 4. Crystallographic data for 6 and 7

Table S1

|                                                 | <b>6</b>                                         | <b>7</b>                                         |
|-------------------------------------------------|--------------------------------------------------|--------------------------------------------------|
| CCDC                                            | 1907390                                          | 1907391                                          |
| net formula                                     | C <sub>26</sub> H <sub>26</sub> FNO <sub>2</sub> | C <sub>26</sub> H <sub>26</sub> FNO <sub>2</sub> |
| <i>M<sub>r</sub></i> /g mol <sup>-1</sup>       | 403.48                                           | 403.48                                           |
| crystal size/mm                                 | 0.100 × 0.030 × 0.020                            | 0.100 × 0.070 × 0.060                            |
| crystal system                                  | orthorhombic                                     | orthorhombic                                     |
| space group                                     | 'P 21 21 21'                                     | 'P 21 21 21'                                     |
| <i>a</i> /Å                                     | 9.6001(8)                                        | 9.7398(4)                                        |
| <i>b</i> /Å                                     | 17.4122(16)                                      | 10.4787(5)                                       |
| <i>c</i> /Å                                     | 38.547(4)                                        | 20.4221(9)                                       |
| <i>α</i> /°                                     | 90                                               | 90                                               |
| <i>β</i> /°                                     | 90                                               | 90                                               |
| <i>γ</i> /°                                     | 90                                               | 90                                               |
| <i>V</i> /Å <sup>3</sup>                        | 6443.5(10)                                       | 2084.29(16)                                      |
| <i>Z</i>                                        | 12                                               | 4                                                |
| calc. density/g cm <sup>-3</sup>                | 1.248                                            | 1.286                                            |
| <i>μ</i> /mm <sup>-1</sup>                      | 0.084                                            | 0.087                                            |
| transmission factor range                       | 0.96–1.00                                        | 0.96–0.99                                        |
| refls. measured                                 | 77036                                            | 48775                                            |
| <i>R</i> <sub>int</sub>                         | 0.1383                                           | 0.0545                                           |
| mean <i>σ</i> ( <i>I</i> )/ <i>I</i>            | 0.0889                                           | 0.0418                                           |
| <i>θ</i> range                                  | 2.339–25.350                                     | 3.484–36.313                                     |
| observed refls.                                 | 7567                                             | 8541                                             |
| <i>x</i> , <i>y</i> (weighting scheme)          | 0.0342, 2.1173                                   | 0.0756, 0.0638                                   |
| Flack parameter                                 | 0.5                                              | 0.1(2)                                           |
| refls in refinement                             | 11793                                            | 10078                                            |
| parameters                                      | 818                                              | 273                                              |
| restraints                                      | 0                                                | 0                                                |
| <i>R</i> ( <i>F</i> <sub>obs</sub> )            | 0.0667                                           | 0.0524                                           |
| <i>R</i> <sub>w</sub> ( <i>F</i> <sup>2</sup> ) | 0.1283                                           | 0.1307                                           |
| <i>S</i>                                        | 1.038                                            | 1.082                                            |
| shift/error <sub>max</sub>                      | 0.001                                            | 0.001                                            |
| max electron density/e Å <sup>-3</sup>          | 0.172                                            | 0.490                                            |
| min electron density/e Å <sup>-3</sup>          | -0.190                                           | -0.287                                           |



## 5. NMR spectra

### 5-(4-Fluorophenyl)-1-(2-((2*R*,4*R*)-4-hydroxy-6-oxotetrahydro-2*H*-pyran-2-yl)ethyl)-2-isopropyl-*N*,4-diphenyl-1*H*-pyrrole-3-carboxamide (2)

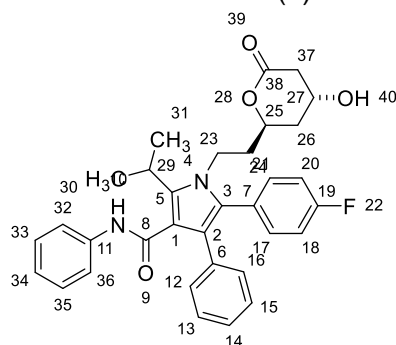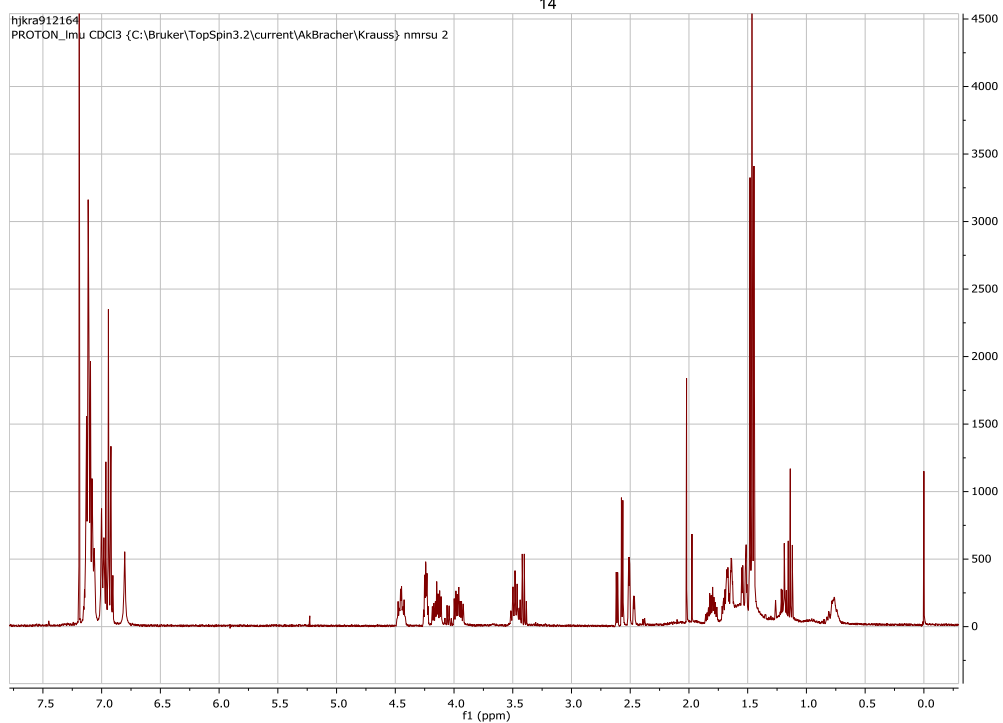

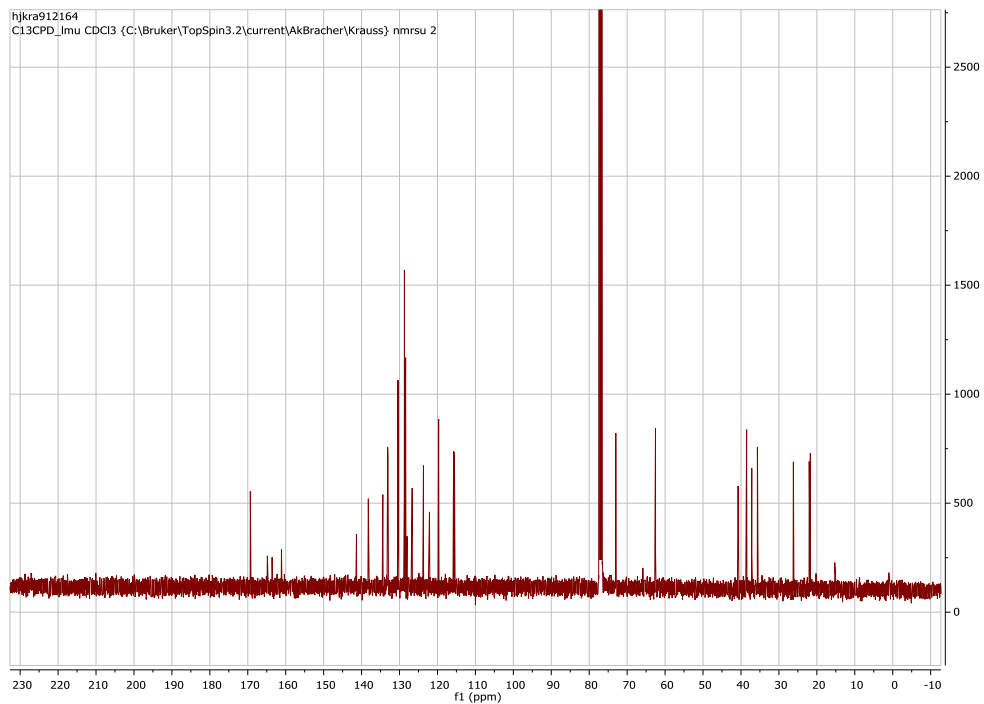

**(S)-5-(4-Fluorophenyl)-2-isopropyl-1-(2-(6-oxo-3,6-dihydro-2H-pyran-2-yl)ethyl)-N,4-diphenyl-1H-pyrrole-3-carboxamide (3)**

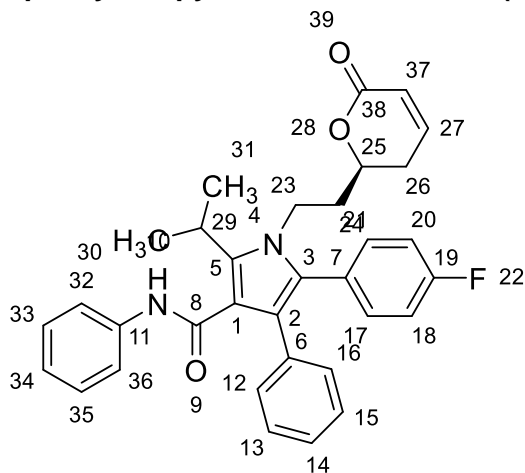

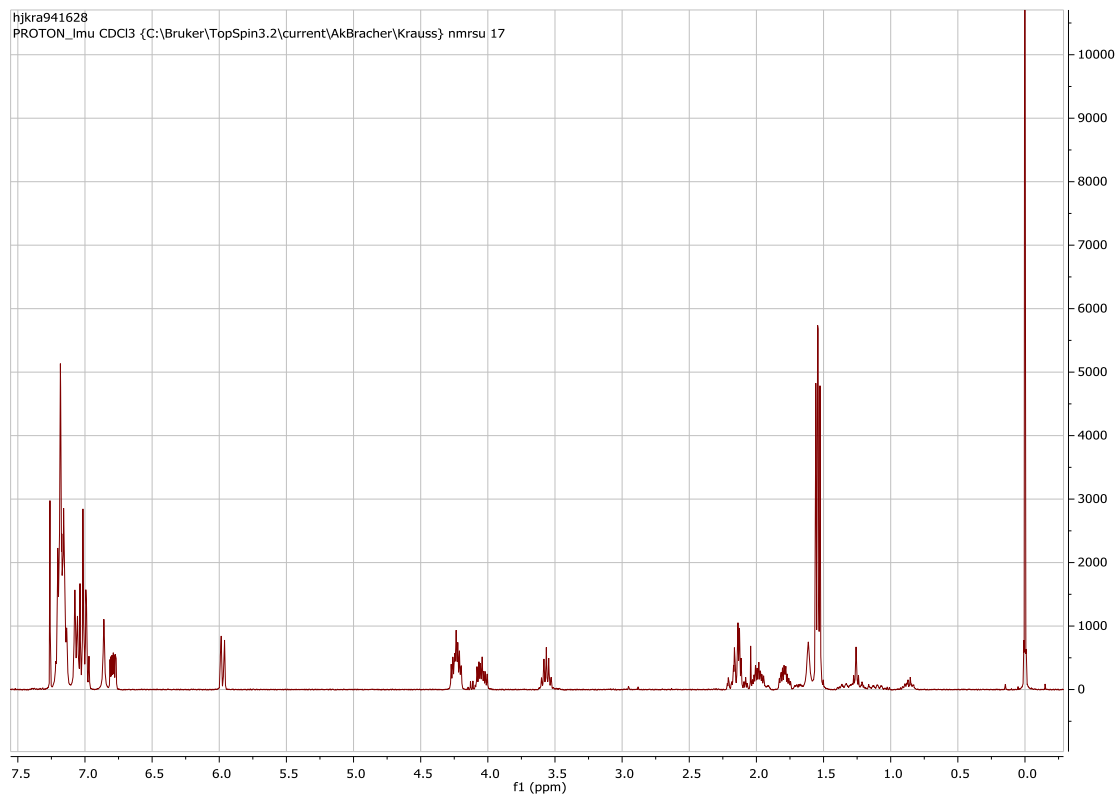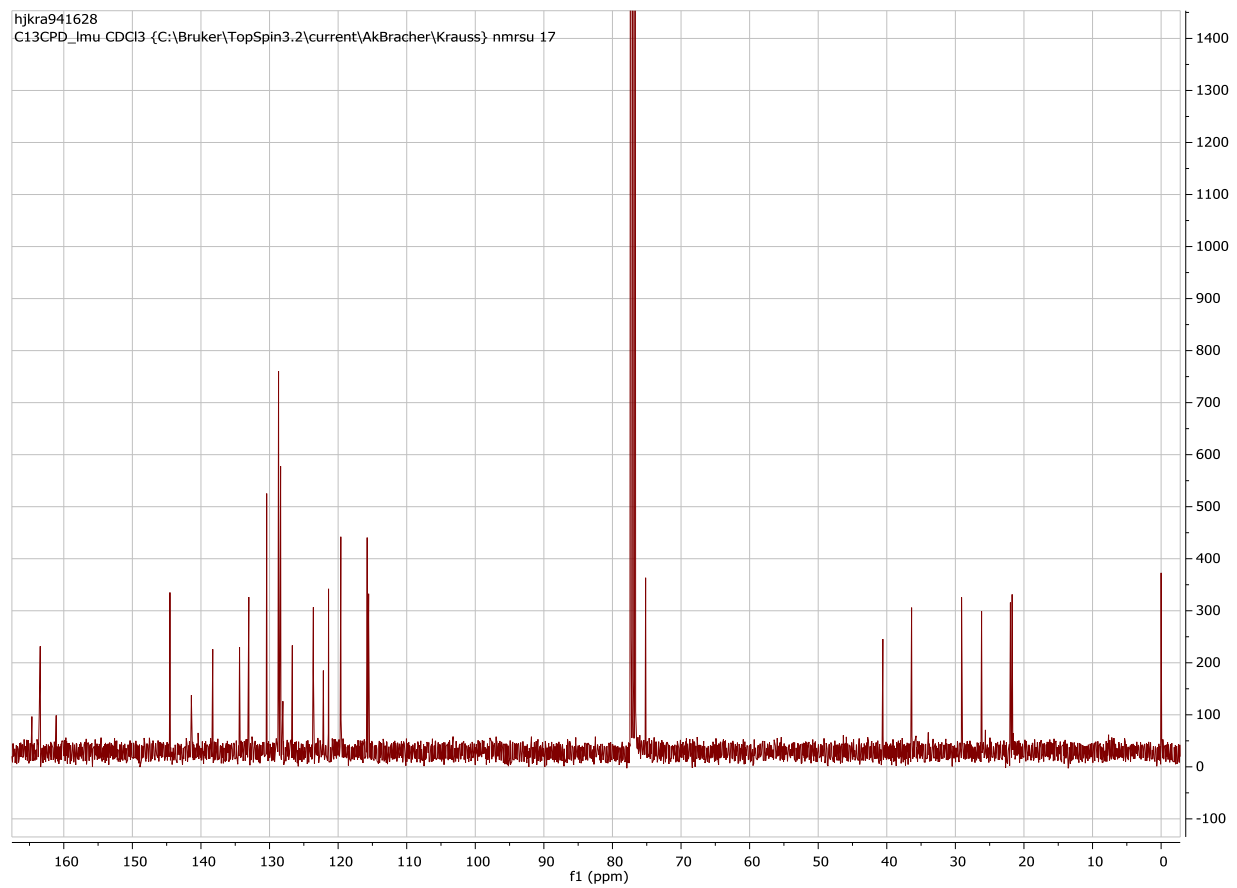

**(1*S*,5*R*)-9-(4-Fluorophenyl)-11-isopropyl-10-phenyl-1,2,6,7-tetrahydro-3*H*,5*H*-1,5-methanopyrrolo[1,2-*e*][1,5]oxazonin-3-one (6)**

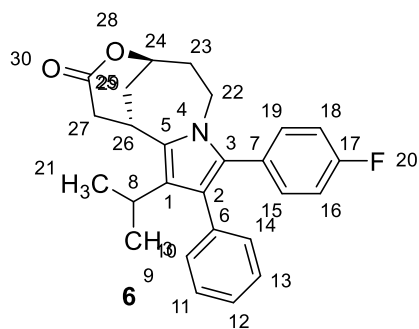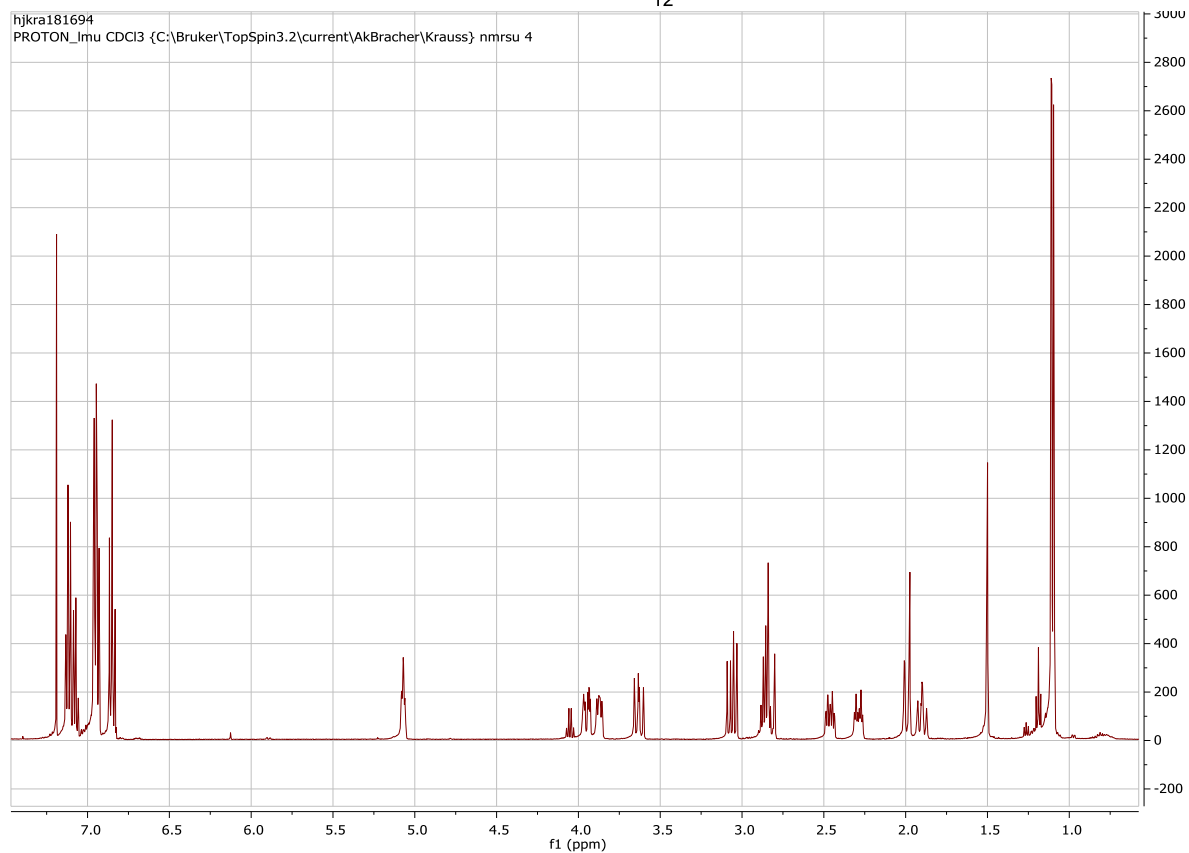

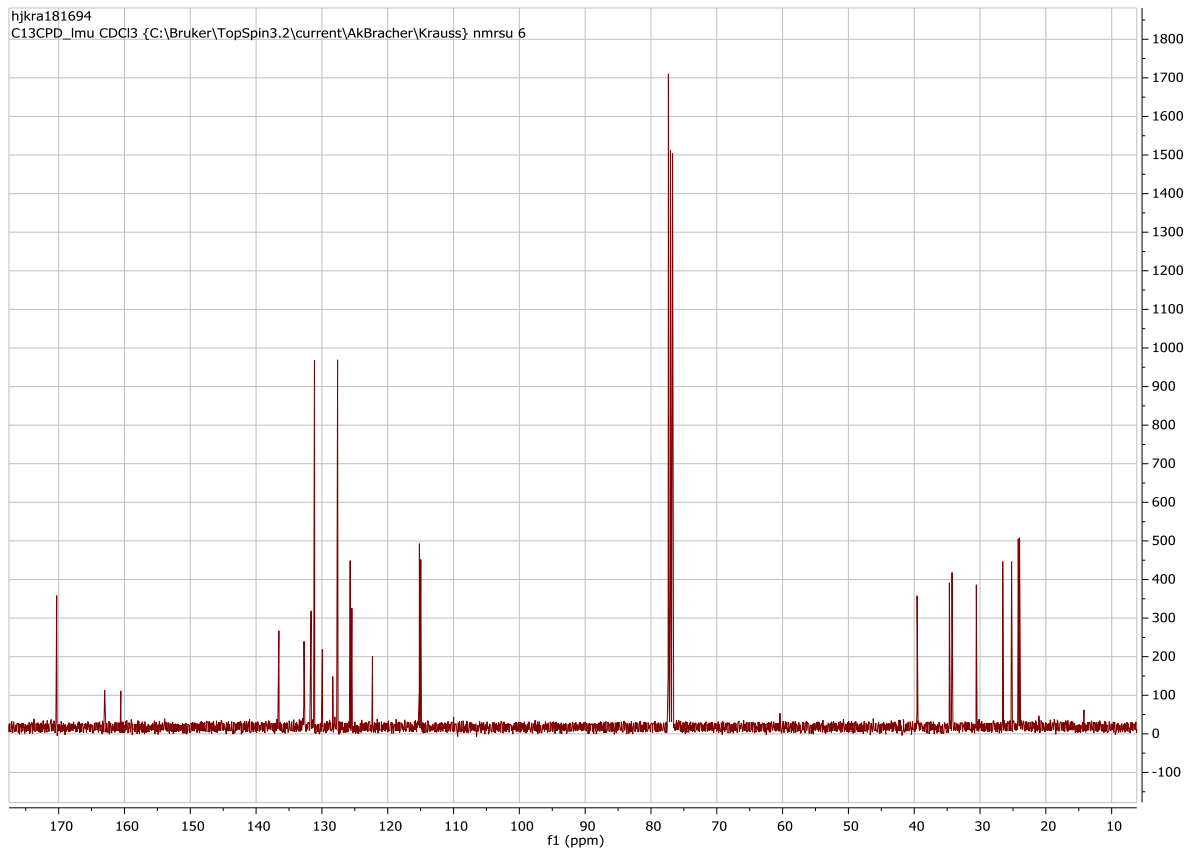

**(S)-6-(2-(2-(4-Fluorophenyl)-5-isopropyl-3-phenyl-1*H*-pyrrol-1-yl)ethyl)-5,6-dihydro-2*H*-pyran-2-one (7)**

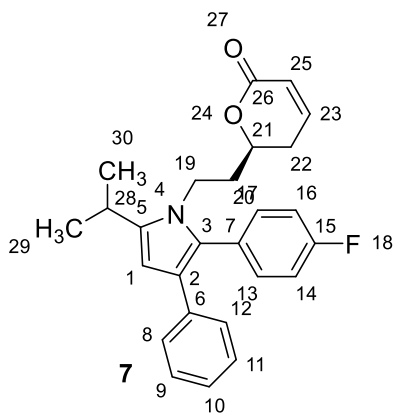

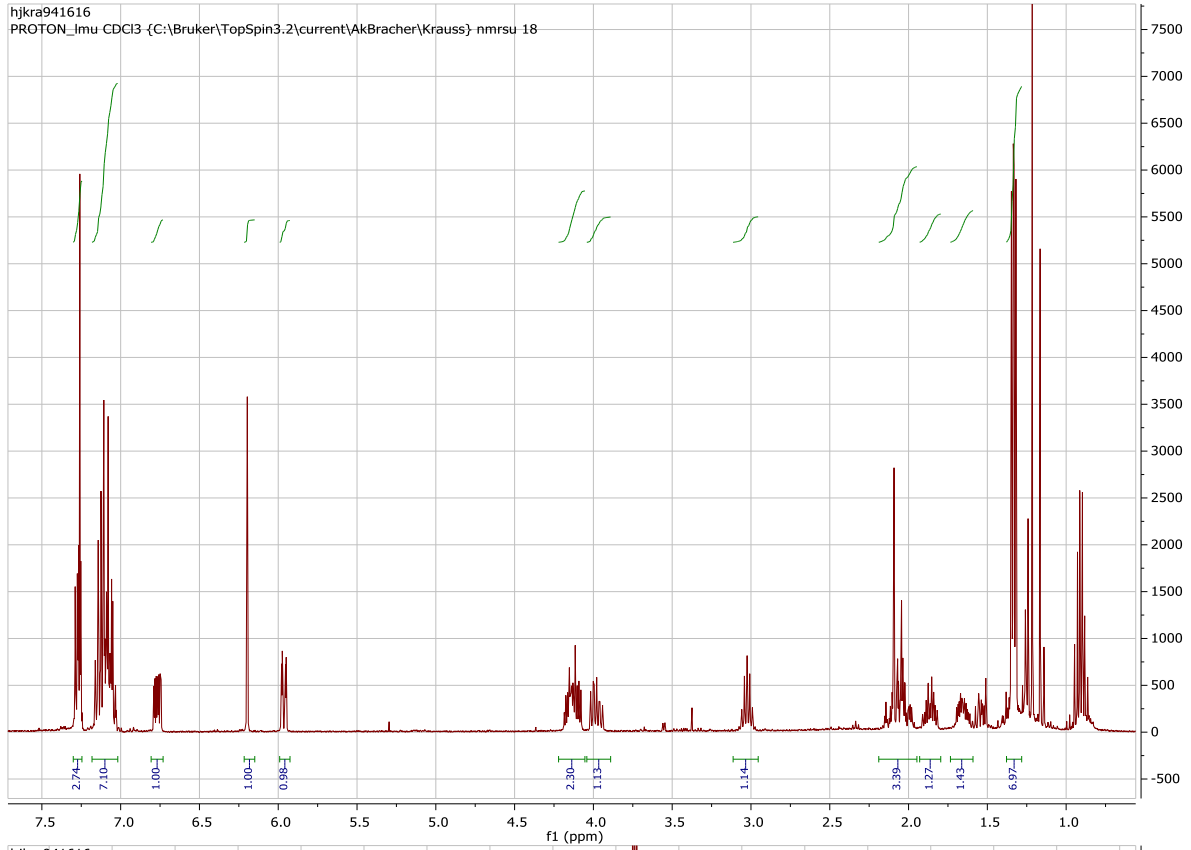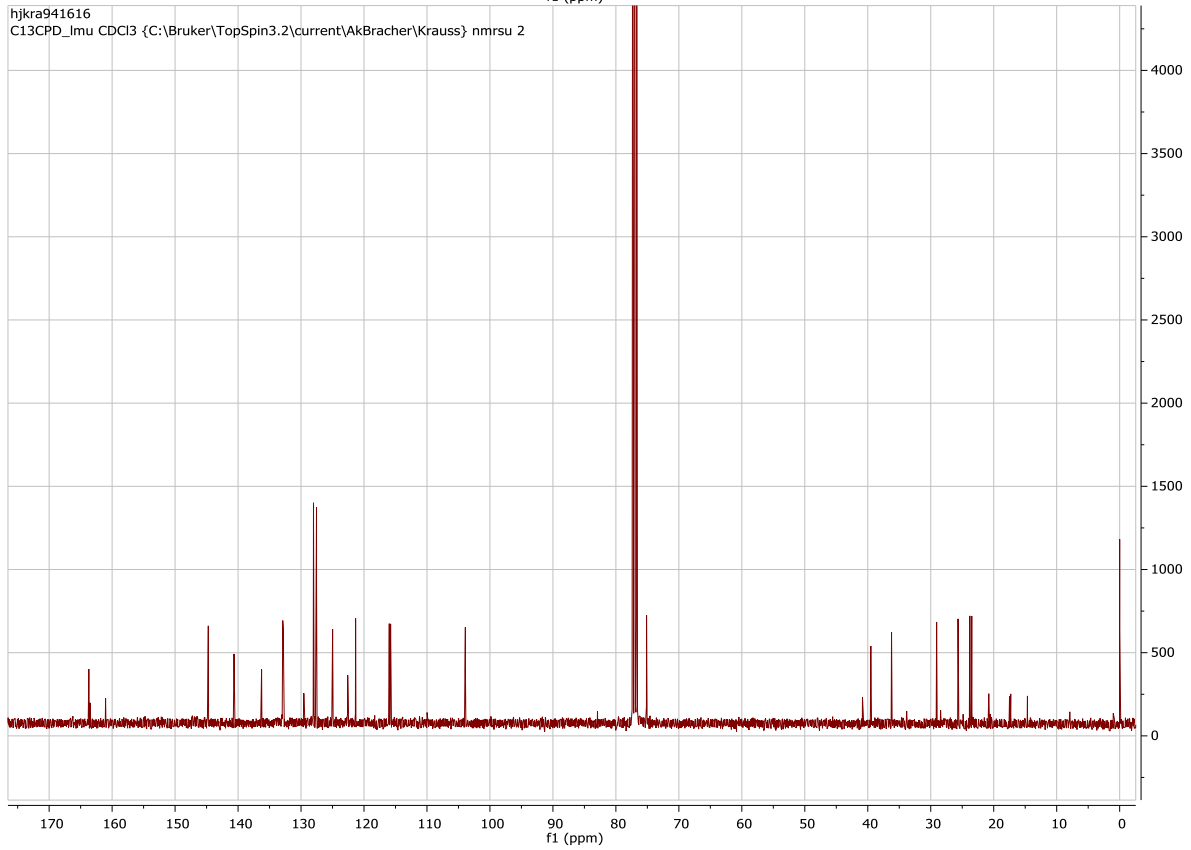

## References

- [1] J. Stach, J. Havlíček, L. Plaček, S. Rádl, Synthesis of some impurities and/or degradation products of atorvastatin, Coll. Czech. Chem. Commun. 73 (2008) 229-246. <https://doi.org/10.1135/cccc20080229>.
- [2] Bruker (2012). *SAINTE*. Bruker AXS Inc., Madison, Wisconsin, USA.
- [3] G.M. Sheldrick (1996). *SADABS*. University of Göttingen, Germany.
- [4] G.M. Sheldrick, SHELXT- Integrated space-group and crystal-structure determination, Acta Crystallogr. A, Found. Adv. 71 (2015) 3-8.  
<http://search.ebscohost.com/login.aspx?direct=true&db=a9h&AN=100256836&site=ehost-live>.
- [5] L. Farrugia, WinGX and ORTEP for Windows: an update, J. Appl. Crystallogr. 45 (2012) 849-854.  
<https://doi.org/10.1107/S0021889812029111>.
